# Supplementary material for: Annual net CO 2 fluxes from drained organic soils used for agriculture in the hemiboreal region of Europe
Source: Copernicus journal article supplement (doi:10.5194/bg-22-4241-2025), 2025-08-27
Supplement: Supplementary file 1 [file bg-22-4241-2025-supplement.pdf]

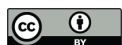

*Supplement of*

## **Annual net CO<sub>2</sub> fluxes from drained organic soils used for agriculture in the hemiboreal region of Europe**

**Arta Bārdule et al.**

*Correspondence to:* Arta Bārdule (arta.bardule@silava.lv)

The copyright of individual parts of the supplement might differ from the article licence.

**Table S1.** Summary of study sites with drained nutrient-rich organic soil, description of specific measurement period of ecosystem respiration ( $R_{eco}$ ) and soil heterotrophic respiration ( $R_{het}$ ) and plant biomass sampling.

| Land use  | Country   | Study sites, coordinates (WGS84 system); X – longitude, Y – latitude | Measurements of $R_{eco}$                 |                     |                          | Measurements of $R_{het}$                 |                     |                          | Plant biomass sampling (date)            |                                              |
|-----------|-----------|----------------------------------------------------------------------|-------------------------------------------|---------------------|--------------------------|-------------------------------------------|---------------------|--------------------------|------------------------------------------|----------------------------------------------|
|           |           |                                                                      | No. of plots/<br>No. of chambers per plot | Measurement period  | Frequency of measurement | No. of plots/<br>No. of chambers per plot | Measurement period  | Frequency of measurement | Above-ground                             | Below-ground                                 |
| Cropland  | Latvia    | CL_LV_1;<br>X: 27.01609,<br>Y: 56.71777                              | 1/5                                       | Dec 2016 -Nov 2018  | Once a month             | -                                         | -                   | -                        | -                                        | -                                            |
|           |           | CL_LV_2;<br>X: 27.01533,<br>Y: 56.71890                              | 1/5                                       | Dec 2016 -Nov 2018  | Once a month             | -                                         | -                   | -                        | -                                        | -                                            |
|           |           | CL_LV_3;<br>X: 22.58267,<br>Y: 57.13077                              | 1/5                                       | Dec 2016 -Nov 2018  | Once a month             | -                                         | -                   | -                        | -                                        | -                                            |
|           |           | CL_LV_4;<br>X: 23.94817,<br>Y: 56.85442                              | 1/5                                       | Dec 2016 -Nov 2018  | Once a month             | -                                         | -                   | -                        | -                                        | -                                            |
|           |           | CL_LV_5;<br>X: 22.83829,<br>Y: 56.56447                              | 3/1-2                                     | Jan 2021 - Dec 2022 | Once a month             | 3/3                                       | Apr 2021 - Nov 2022 | Once a month             | 04.08.2021                               | 04.08.2021                                   |
|           |           | CL_LV_6;<br>X: 22.84456,<br>Y: 56.5582                               | 3/1-2                                     | Jan 2021 - Dec 2022 | Once a month             | 3/3                                       | Apr 2021 - Nov 2022 | Once a month             | 11.08.2021                               | 11.08.2021                                   |
|           | Estonia   | CL_EE_1;<br>X: 26.730312,<br>Y: 58.035321                            | 3/2                                       | Jan 2021 - Dec 2022 | Twice a month            | 3/3                                       | Apr 2021 - Nov 2022 | Twice a month            | 02.08.2021                               | 28.04.2021,<br>30.08.2021,<br>27.-30.07.2022 |
|           | Lithuania | CL_LT_1;<br>X: 24.077234,<br>Y: 54.790503                            | 3/1-2                                     | Jul 2021 – Jun 2023 | Once a month             | 3/3                                       | Apr 2021 – Sep 2023 | Once a month             | 15.08.2021,<br>02.08.2022,<br>21.08.2023 | 15.08.2021,<br>02.08.2022,<br>21.08.2023     |
| Grassland | Latvia    | GL_LV_1;<br>X: 23.58187,<br>Y: 56.91087                              | 1/5                                       | Dec 2016 -Jun 2020  | Once a month             | -                                         | -                   | -                        | -                                        | -                                            |
|           |           | GL_LV_2;<br>X: 26.73018,<br>Y: 56.59072                              | 1/5                                       | Dec 2016 -Nov 2018  | Once a month             | -                                         | -                   | -                        | -                                        | -                                            |
|           |           | GL_LV_3;<br>X: 26.80302,<br>Y: 56.40100                              | 1/5                                       | Dec 2016 -Nov 2018  | Once a month             | -                                         | -                   | -                        | -                                        | -                                            |
|           |           | GL_LV_4;<br>X: 21.11741,<br>Y: 56.2281                               | 3/1-2                                     | Jan 2021 -Dec 2022  | Once a month             | 3/3                                       | Apr 2021 - Nov 2022 | Once a month             | 12.07.2021                               | 12.07.2021                                   |
|           |           | GL_LV_5;<br>X: 22.84282,<br>Y: 56.55928                              | 3/1-2                                     | Jan 2021 -Dec 2022  | Once a month             | 3/3                                       | Apr 2021 - Nov 2022 | Once a month             | 04.08.2021                               | 04.08.2021                                   |
|           |           | GL_LV_6;<br>X: 21.18817,<br>Y: 56.21148                              | 3/3                                       | Jul 2021 - Apr 2023 | Once a month             | 3/3                                       | Jul 2021 - Jun 2023 | Once a month             | 09.08.2021                               | 09.08.2021                                   |
|           |           | GL_LV_7;<br>X: 22.84415,<br>Y: 56.55887                              | 3/3                                       | Jul 2021 - Apr 2023 | Once a month             | 3/3                                       | Jul 2021 - Jun 2023 | Once a month             | 04.08.2021                               | 04.08.2021                                   |
|           |           | GL_LV_8;<br>X: 24.75663;<br>Y: 56.77254                              | 3/3                                       | Jul 2021 - May 2023 | Once a month             | 3/3                                       | Jul 2021 - Jun 2023 | Once a month             | 09.08.2021                               | 09.08.2021                                   |
|           | Estonia   | GL_EE_1;<br>X: 26.671883,<br>Y: 58.430894                            | 3/2                                       | Jan 2021 -Dec 2022  | Twice a month            | 3/3                                       | Apr 2021 - Nov 2022 | Twice a month            | 26.07.2021,<br>12.09.2021                | 22.04.2021,<br>24.08.2021,<br>27.-30.07.2022 |
|           |           | GL_EE_2;<br>X: 26.732756,<br>Y: 58.03563                             | 3/2                                       | Jan 2021 -Dec 2022  | Twice a month            | 3/3                                       | Apr 2021 - Nov 2022 | Twice a month            | 14.06.2021,<br>14.09.2021                | 23.08.2021,<br>06.05.2022,<br>27.-30.07.2022 |
|           |           | GL_EE_3;<br>X: 26.6734173,<br>Y: 58.4293805                          | 3/2                                       | Jan 2021 -Dec 2022  | Twice a month            | 3/3                                       | Apr 2021 - Nov 2022 | Twice a month            | -                                        | 22.04.2021,<br>24.08.2021,<br>27.-30.07.2022 |
|           | Lithuania | GL_LT_1;<br>X: 24.085606,<br>Y: 54.808451                            | 3/1-2                                     | Jul 2021 – Jun 2023 | Once a month             | 3/3                                       | Apr 2021 – Oct 2023 | Once a month             | 17.08.2022,<br>15.08.2023                | 01.07.2023.                                  |

**Table S2.** Description of the vegetation species composition in the grassland sites.

| Land use  | Country   | Study sites | Vegetation species composition                                                                                                                                                                                                                                                                                                                                                                                                                                                                                                                                                                                                                                                                                                                                                                                                                                                                                                                                                                                                                                                                                                                                                                                                                                                                 |
|-----------|-----------|-------------|------------------------------------------------------------------------------------------------------------------------------------------------------------------------------------------------------------------------------------------------------------------------------------------------------------------------------------------------------------------------------------------------------------------------------------------------------------------------------------------------------------------------------------------------------------------------------------------------------------------------------------------------------------------------------------------------------------------------------------------------------------------------------------------------------------------------------------------------------------------------------------------------------------------------------------------------------------------------------------------------------------------------------------------------------------------------------------------------------------------------------------------------------------------------------------------------------------------------------------------------------------------------------------------------|
| Grassland | Latvia    | GL_LV_1     | Listed by dominance, areal coverage: Canadian Goldenrod ( <i>Solidago canadensis</i> ), Rough-stalked Feather-moss ( <i>Brachythecium rutabulum</i> ), Cock's-foot ( <i>Dactylis glomerata</i> ), Alpine thyme-moss ( <i>Plagiommium medium</i> ), meadow Fescue ( <i>Festuca pratensis</i> ), Yarrow ( <i>Achillea millefolium</i> ), tufted Vetch ( <i>Vicia cracca</i> ), Yorkshire-fog ( <i>Holcus lanatus</i> ), meadow Oat-grass ( <i>Avenula pratensis</i> ), heath Wood-rush ( <i>Luzula multiflora</i> ), cow Parsley ( <i>Anthriscus sylvestris</i> ), hop Trefoil ( <i>Trifolium campestre</i> ), upright Hedge-bedstraw ( <i>Galium album</i> ), common Reed ( <i>Phragmites australis</i> ), field Horsetail ( <i>Equisetum arvense</i> ), germander Speedwell ( <i>Veronica chamaedrys</i> ), sheep's Sorrel ( <i>Rumex acetosella</i> ), common Dandelion ( <i>Taraxacum officinale</i> ), Woodsy Thyme-moss ( <i>Plagiommium cuspidatum</i> ), three-nerved Sandwort ( <i>Moehringia trinervia</i> ), meadow Vetchling ( <i>Lathyrus pratensis</i> )                                                                                                                                                                                                                           |
|           |           | GL_LV_2     | Not determined                                                                                                                                                                                                                                                                                                                                                                                                                                                                                                                                                                                                                                                                                                                                                                                                                                                                                                                                                                                                                                                                                                                                                                                                                                                                                 |
|           |           | GL_LV_3     | Not determined                                                                                                                                                                                                                                                                                                                                                                                                                                                                                                                                                                                                                                                                                                                                                                                                                                                                                                                                                                                                                                                                                                                                                                                                                                                                                 |
|           |           | GL_LV_4     | Listed by dominance, areal coverage: rough Meadow-grass ( <i>Poa trivialis</i> ), tufted Hair-grass ( <i>Deschampsia cespitosa</i> ), Narrow-leaved Meadow-Grass ( <i>Poa angustifolia</i> ), creeping Buttercup ( <i>Ranunculus repens</i> ), soft-Rush ( <i>Juncus effusus</i> ), Gipsywort ( <i>Lycopus europaeus</i> ), Tormentil ( <i>Potentilla erecta</i> ), Willow ( <i>Salix</i> sp.), tufted Vetch ( <i>Vicia cracca</i> ), lesser Trefoil ( <i>Trifolium dubium</i> ), hoary Willowherb ( <i>Epilobium parviflorum</i> ), lesser Hemp-nettle ( <i>Galeopsis bifida</i> ), red Bartsia (s.l.) ( <i>Odontites vulgaris</i> )                                                                                                                                                                                                                                                                                                                                                                                                                                                                                                                                                                                                                                                          |
|           |           | GL_LV_5     | Listed by dominance, areal coverage: Tall fescue ( <i>Lolium arundinaceum</i> ), Ground-ivy ( <i>Glechoma hederacea</i> ), lesser Stitchwort ( <i>Stellaria graminea</i> ), creeping Buttercup ( <i>Ranunculus repens</i> ), perennial Rye-grass ( <i>Lolium perenne</i> ), Mugwort ( <i>Artemisia vulgaris</i> ), curled Thistle ( <i>Carduus crispus</i> ), northern Dock ( <i>Rumex longifolius</i> ), Narrow-leaved Meadow-Grass ( <i>Poa angustifolia</i> ), Silverweed ( <i>Potentilla anserina</i> ), white Clover ( <i>Trifolium repens</i> ), common Dandelion ( <i>Taraxacum officinale</i> ), zigzag Clover ( <i>Trifolium medium</i> ), alsike Clover ( <i>Trifolium hybridum</i> ), common Bent ( <i>Agrostis tenuis</i> ), annual Meadow-grass ( <i>Poa annua</i> ), field Bindweed ( <i>Convolvulus arvensis</i> ), Redshank ( <i>Persicaria maculosa</i> ), common Chickweed ( <i>Stellaria media</i> ), tufted Vetch ( <i>Vicia cracca</i> ), Black-bindweed ( <i>Fallopia convolvulus</i> ), greater Plantain ( <i>Plantago major</i> ), perennial Sow-thistle ( <i>Sonchus arvensis</i> ), field Pansy ( <i>Viola arvensis</i> ), common Hemp-nettle ( <i>Galeopsis tetrahit</i> ), water Avens ( <i>Geum rivale</i> ), Shepherd's-purse ( <i>Capsella bursa-pastoris</i> ) |
|           |           | GL_LV_6     | The dominant plant functional group: graminoid (more detailed information is not available)                                                                                                                                                                                                                                                                                                                                                                                                                                                                                                                                                                                                                                                                                                                                                                                                                                                                                                                                                                                                                                                                                                                                                                                                    |
|           |           | GL_LV_7     | The dominant plant functional group: graminoid (more detailed information is not available)                                                                                                                                                                                                                                                                                                                                                                                                                                                                                                                                                                                                                                                                                                                                                                                                                                                                                                                                                                                                                                                                                                                                                                                                    |
|           |           | GL_LV_8     | The dominant plant functional group: forbs and graminoid (more detailed information is not available)                                                                                                                                                                                                                                                                                                                                                                                                                                                                                                                                                                                                                                                                                                                                                                                                                                                                                                                                                                                                                                                                                                                                                                                          |
|           | Estonia   | GL_EE_1     | Listed by dominance, areal coverage: meadowsweet or mead wort ( <i>Filipendula ulmaria</i> ), meadow foxtail ( <i>Alopecurus pratensis</i> ), Canary grass ( <i>Phalaris arundinacea</i> ), geraniums ( <i>Geranium</i> sp), ground elder ( <i>Aegopodium podagraria</i> ), buttercups ( <i>Ranunculus</i> sp), water avens ( <i>Geum rivale</i> )                                                                                                                                                                                                                                                                                                                                                                                                                                                                                                                                                                                                                                                                                                                                                                                                                                                                                                                                             |
|           |           | GL_EE_2     | Listed by dominance, areal coverage: couch grass ( <i>Elymus repens</i> ), meadow foxtail ( <i>Alopecurus pratensis</i> ), tall fescue ( <i>Lolium arundinaceum</i> ), reed grass or smallweed ( <i>Calamagrostis</i> sp), Cocksfoot ( <i>Dactylis glomerata</i> L.)                                                                                                                                                                                                                                                                                                                                                                                                                                                                                                                                                                                                                                                                                                                                                                                                                                                                                                                                                                                                                           |
|           |           | GL_EE_3     | Listed by dominance, areal coverage: gabbage thistle ( <i>Cirsium oleraceum</i> ), meadowsweet or mead wort ( <i>Filipendula ulmaria</i> ), Canary grass ( <i>Phalaris arundinacea</i> ), common comfrey ( <i>Symphytum officinale</i> ), cleavers, clivers, catchweed, robin-run-the-hedge, goosegrass, and sticky willy ( <i>Galium aparine</i> , c sp)                                                                                                                                                                                                                                                                                                                                                                                                                                                                                                                                                                                                                                                                                                                                                                                                                                                                                                                                      |
|           | Lithuania | GL_LT_1     | Milk-parsley ( <i>Peucedanum palustre</i> L.) Moench, meadowsweet ( <i>Filipendula ulmaria</i> L.) Maxim.), common marsh bedstraw ( <i>Galium palustre</i> L.), common couch ( <i>Elymus repens</i> L.) Gould, wild mint ( <i>Mentha arvensis</i> L.), common nettle ( <i>Urtica dioica</i> L.), and creeping bent grass ( <i>Agrostis stolonifera</i> L.)                                                                                                                                                                                                                                                                                                                                                                                                                                                                                                                                                                                                                                                                                                                                                                                                                                                                                                                                     |

**Table S3.** Results of Spearman's rank correlation between mean instantaneous ecosystem respiration ( $R_{eco}$ ) and different site and soil characteristics in cropland and grassland ( $\rho$  value,  $p$  value). Statistically significant correlations ( $p < 0.050$ ) are highlighted in bold.

| Land use                               | Cropland                |                         |              | Grassland    |              |              |
|----------------------------------------|-------------------------|-------------------------|--------------|--------------|--------------|--------------|
| Site characteristics                   |                         |                         |              |              |              |              |
| Thickness of organic soil layer (mean) | -0.43, 0.092            |                         |              | 0.01, 0.939  |              |              |
| Water-table level (mean)               | 0.08, 0.775             |                         |              | -0.33, 0.075 |              |              |
| Soil characteristics                   |                         |                         |              |              |              |              |
| Soil layer                             | 0-20 cm                 | 20-40 cm                | 40-80 cm     | 0-20 cm      | 20-40 cm     | 40-80 cm     |
| TC                                     | -0.48, 0.097            | -0.49, 0.089            | 0.05, 0.892  | 0.13, 0.492  | 0.11, 0.553  | 0.14, 0.501  |
| OC                                     | -0.48, 0.097            | -0.49, 0.089            | 0.05, 0.892  | 0.11, 0.579  | 0.11, 0.577  | 0.10, 0.649  |
| TN                                     | -0.49, 0.089            | -0.42, 0.157            | 0.07, 0.865  | 0.15, 0.435  | 0.06, 0.740  | 0.13, 0.524  |
| C/N                                    | 0.10, 0.737             | -0.47, 0.110            | -0.26, 0.470 | -0.15, 0.435 | 0.10, 0.603  | 0.23, 0.268  |
| pH                                     | 0.43, 0.146             | -0.12, 0.696            | -0.45, 0.191 | -0.06, 0.761 | 0.05, 0.803  | 0.04, 0.864  |
| K                                      | <b>0.78, 0.003</b>      | 0.52, 0.074             | 0.25, 0.492  | 0.16, 0.384  | 0.13, 0.508  | 0.05, 0.795  |
| Ca                                     | <b>-0.94, &lt;0.001</b> | <b>-0.93, &lt;0.001</b> | -0.31, 0.387 | 0.07, 0.728  | -0.04, 0.829 | 0.01, 0.958  |
| Mg                                     | <b>0.59, 0.036</b>      | 0.44, 0.135             | 0.08, 0.838  | 0.10, 0.587  | 0.04, 0.831  | 0.18, 0.396  |
| P                                      | -0.33, 0.272            | 0.11, 0.723             | 0.16, 0.657  | 0.11, 0.567  | 0.07, 0.714  | 0.06, 0.781  |
| Bulk density                           | 0.54, 0.061             | 0.16, 0.604             | -0.02, 0.973 | -0.15, 0.418 | -0.03, 0.866 | -0.09, 0.673 |

**Table S4.** Results of the PLS regression analyses explaining the variation in mean instantaneous Reco among study sites in cropland depending on the soil physico-chemical variables (VIP values > 0.5 in decreasing order, statistics of regression coefficients).

| Soil physico-chemical variable, soil layer | VIP value | Regression coefficients |        |         |
|--------------------------------------------|-----------|-------------------------|--------|---------|
|                                            |           | Coefficient             | SE     | p-value |
| Ca, 0-20 cm                                | 1.92      | -0.109                  | 0.0329 | 0.006   |
| Ca, 20-40 cm                               | 1.81      | -0.103                  | 0.0295 | 0.005   |
| K, 0-20 cm                                 | 1.42      | 0.0806                  | 0.0221 | 0.004   |
| K, 20-40 cm                                | 1.21      | 0.0690                  | 0.0150 | 0.001   |
| Mg, 0-20 cm                                | 0.91      | 0.0521                  | 0.0174 | 0.012   |
| TC, 0-20 cm                                | 0.91      | -0.0517                 | 0.0143 | 0.004   |
| Bulk density, 0-20 cm                      | 0.81      | 0.0460                  | 0.0114 | 0.002   |
| Mg, 20-40 cm                               | 0.79      | 0.0451                  | 0.0254 | 0.108   |
| TN, 0-20 cm                                | 0.76      | -0.0430                 | 0.0161 | 0.022   |
| TC, 20-40 cm                               | 0.67      | -0.0382                 | 0.0169 | 0.045   |
| OC, 0-20 cm                                | 0.66      | -0.0374                 | 0.0190 | 0.075   |
| P, 20-40 cm                                | 0.66      | 0.0376                  | 0.0290 | 0.218   |
| TN, 20-40 cm                               | 0.64      | -0.0364                 | 0.0184 | 0.074   |
| Thickness of organic soil layer            | 0.62      | -0.0355                 | 0.0274 | 0.221   |
| OC, 20-40 cm                               | 0.57      | -0.0324                 | 0.0185 | 0.110   |
| pH, 0-20 cm                                | 0.56      | 0.0318                  | 0.0321 | 0.349   |
| C/N, 20-40 cm                              | 0.54      | -0.0306                 | 0.0396 | 0.439   |

**Table S5.** Mean carbon (C) and nitrogen (N) concentration and C/N ratio in above- and belowground plant biomass in the studied croplands and grasslands.

| Type of land use, vegetation      | Value       | C concentration, g kg <sup>-1</sup> |             | N concentration, g kg <sup>-1</sup> |             | C/N ratio   |             |
|-----------------------------------|-------------|-------------------------------------|-------------|-------------------------------------|-------------|-------------|-------------|
|                                   |             | Aboveground                         | Belowground | Aboveground                         | Belowground | Aboveground | Belowground |
| Cropland, arable crops (n=10)     | Mean ± S.E. | 450 ± 4                             | 404 ± 4     | 17 ± 2                              | 11 ± 1      | 29 ± 3      | 40 ± 4      |
|                                   | Median      | 449                                 | 414         | 17                                  | 9           | 28          | 44          |
|                                   | Range       | 431–473                             | 383–414     | 11–26                               | 8–18        | 19–42       | 22–51       |
| Grassland, perennial grass (n=12) | Mean ± S.E. | 449 ± 2                             | 407 ± 16    | 20 ± 2                              | 16 ± 2      | 25 ± 2      | 28 ± 2      |
|                                   | Median      | 447                                 | 402         | 18                                  | 16          | 26          | 26          |
|                                   | Range       | 442–463                             | 347–484     | 13–30                               | 10–24       | 15–34       | 20–36       |

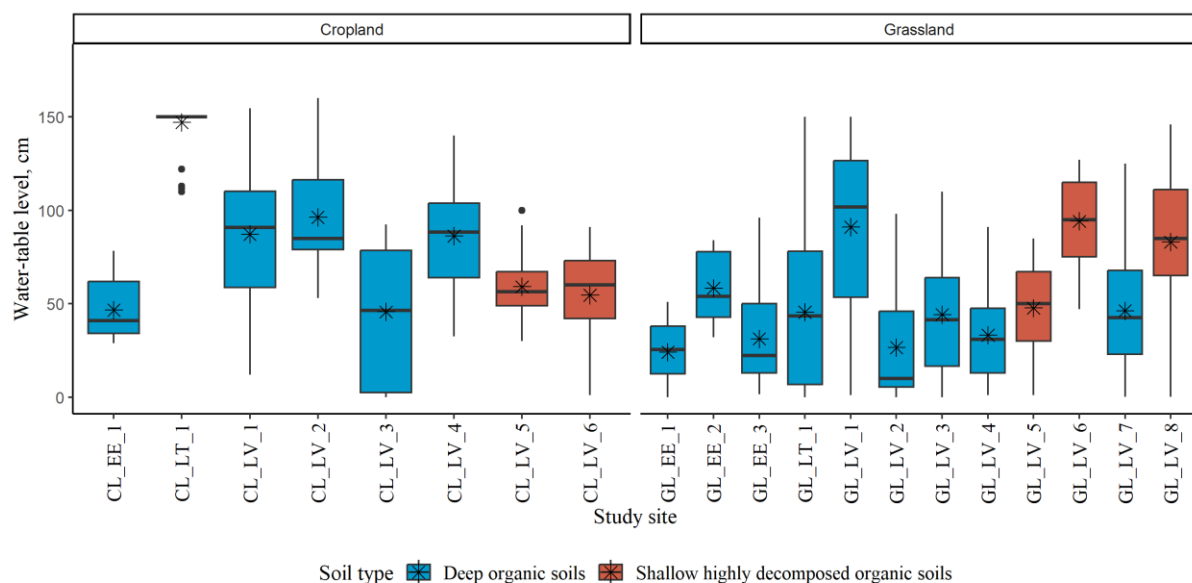

**Figure S1:** Variation in water-table level in the study sites in cropland (left graph) and grassland (right graph). The boxes indicate the interquartile range (from 25<sup>th</sup> to 75<sup>th</sup> percentiles), the bold horizontal line in the boxes shows median value, asterisks show mean values, the whiskers denote the minimum and maximum values, black dots show outliers.

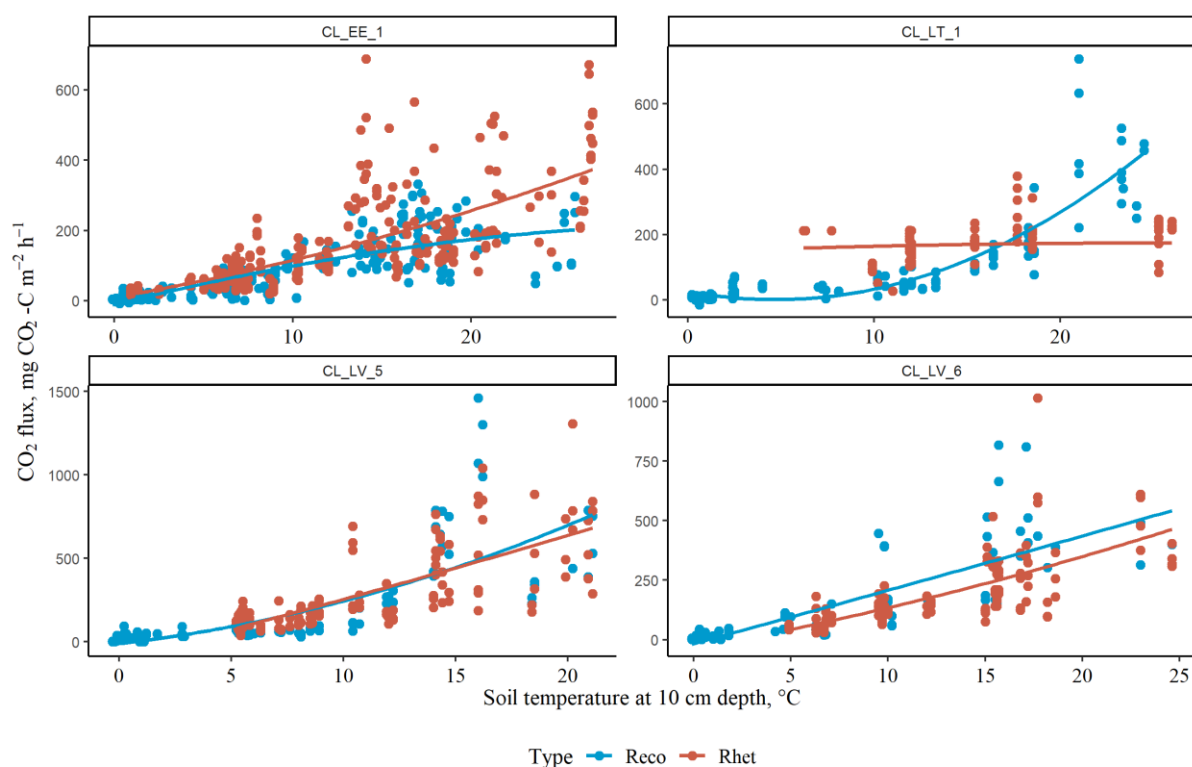

**Figure S2:** Comparison of instantaneous ecosystem respiration ( $R_{eco}$ ) and heterotrophic respiration ( $R_{het}$ ) as a polynomial function of a soil temperature at 10 cm depth in cropland.

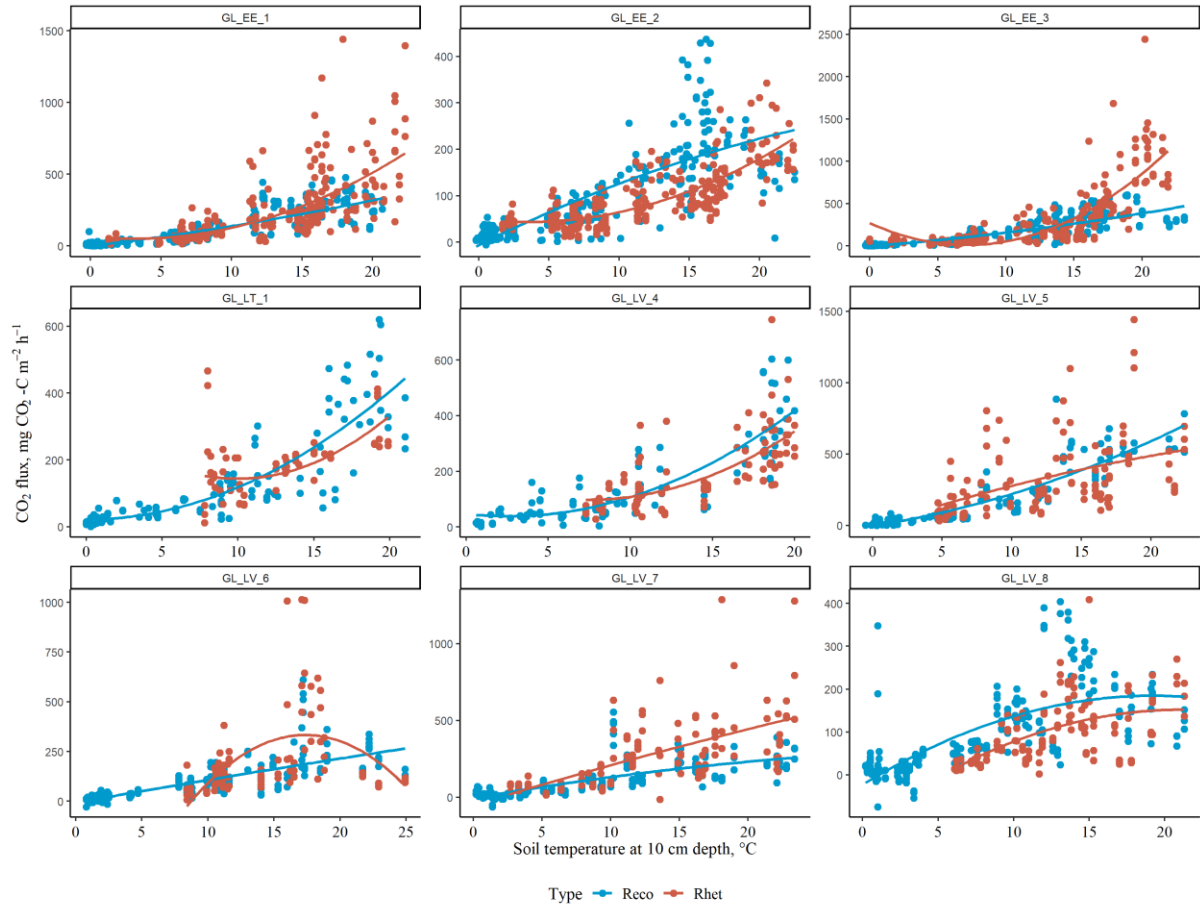

**Figure S3:** Comparison of instantaneous ecosystem respiration ( $R_{eco}$ ) and heterotrophic respiration ( $R_{het}$ ) as a polynomial function of a soil temperature at 10 cm depth in grassland.

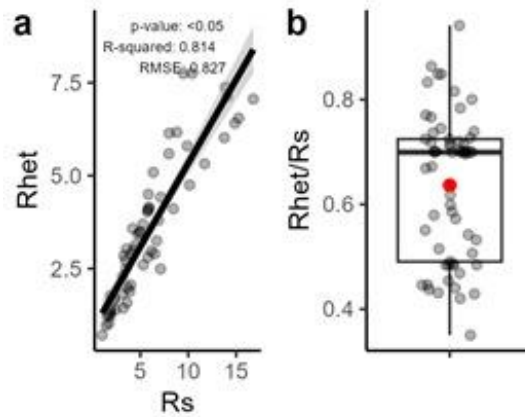

**Figure S4:** Relationship (a) between soil heterotrophic respiration ( $R_{het}$ ) and soil surface respiration ( $R_s$ ) and variation in  $R_{het}/R_s$  ratios (b); results of previous studies ( $n = 61$ ) conducted in temperate and boreal regions (Jian et al., 2021). The interquartile range of the  $R_{het}/R_s$  from previous studies is 0.49 to 0.72. However, in all our study sites, we used a consistent approach with a fixed conversion coefficient of 0.64. This decision is based on observations from research ( $n = 61$ ) that show a linear relationship ( $R^2 = 0.81$ ) between  $R_{het}$  and  $R_s$  ( $t \text{ CO}_2\text{-C ha}^{-1} \text{ year}^{-1}$ ), regardless of the inclusion of agricultural vegetation ( $n = 22$ ) and soil type ( $n = 17$ ) in the data set. The confidence interval for this coefficient is 0.04 around the mean of 0.64, which is less than 6 %, thereby ensuring acceptable calculation accuracy.

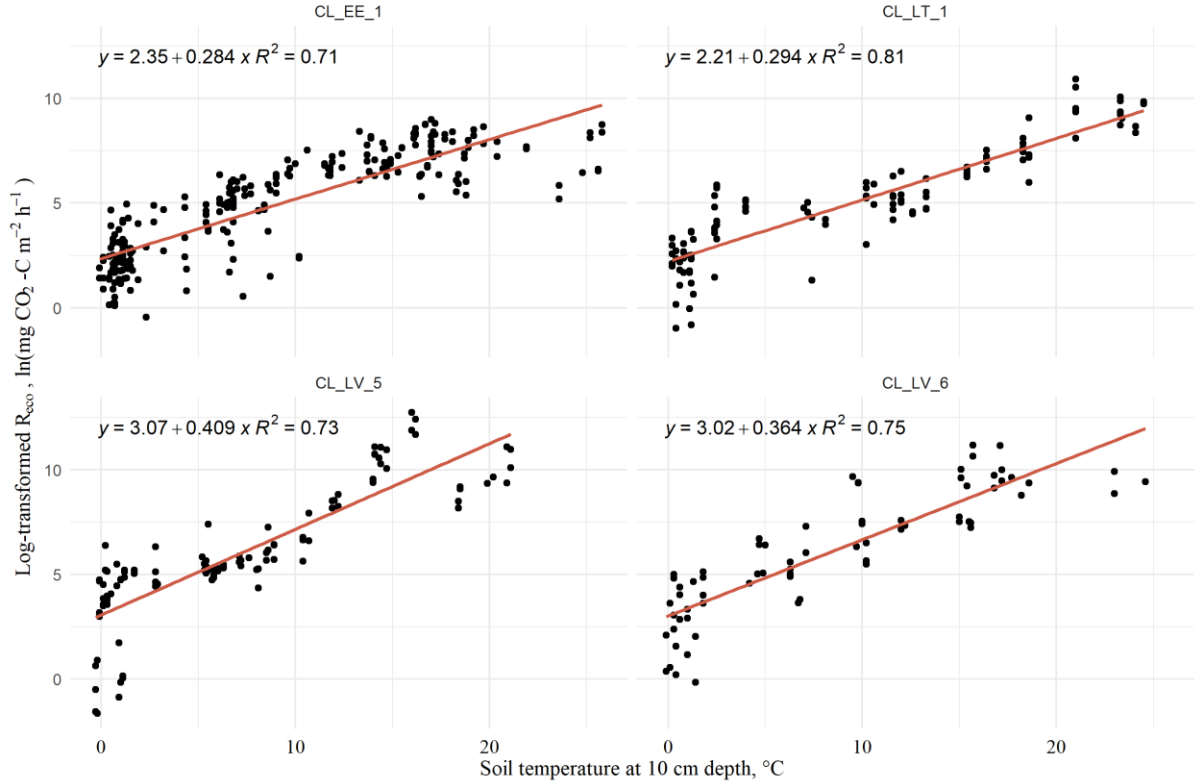

**Figure S5:** The relationship between log-transformed instantaneous ecosystem respiration ( $R_{eco}$ ) and soil temperature at 10 cm depth in study sites in cropland.

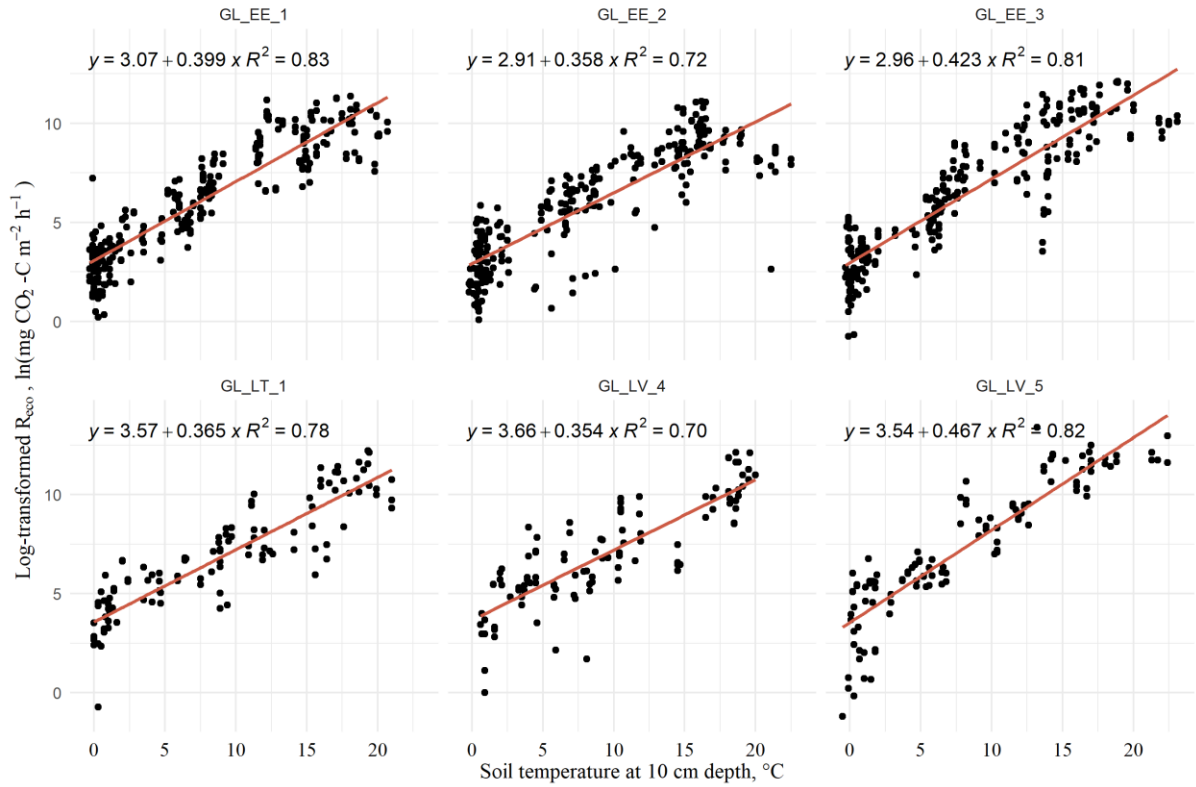

**Figure S6:** The relationship between log-transformed instantaneous ecosystem respiration ( $R_{eco}$ ) and soil temperature at 10 cm depth in study sites in grassland.

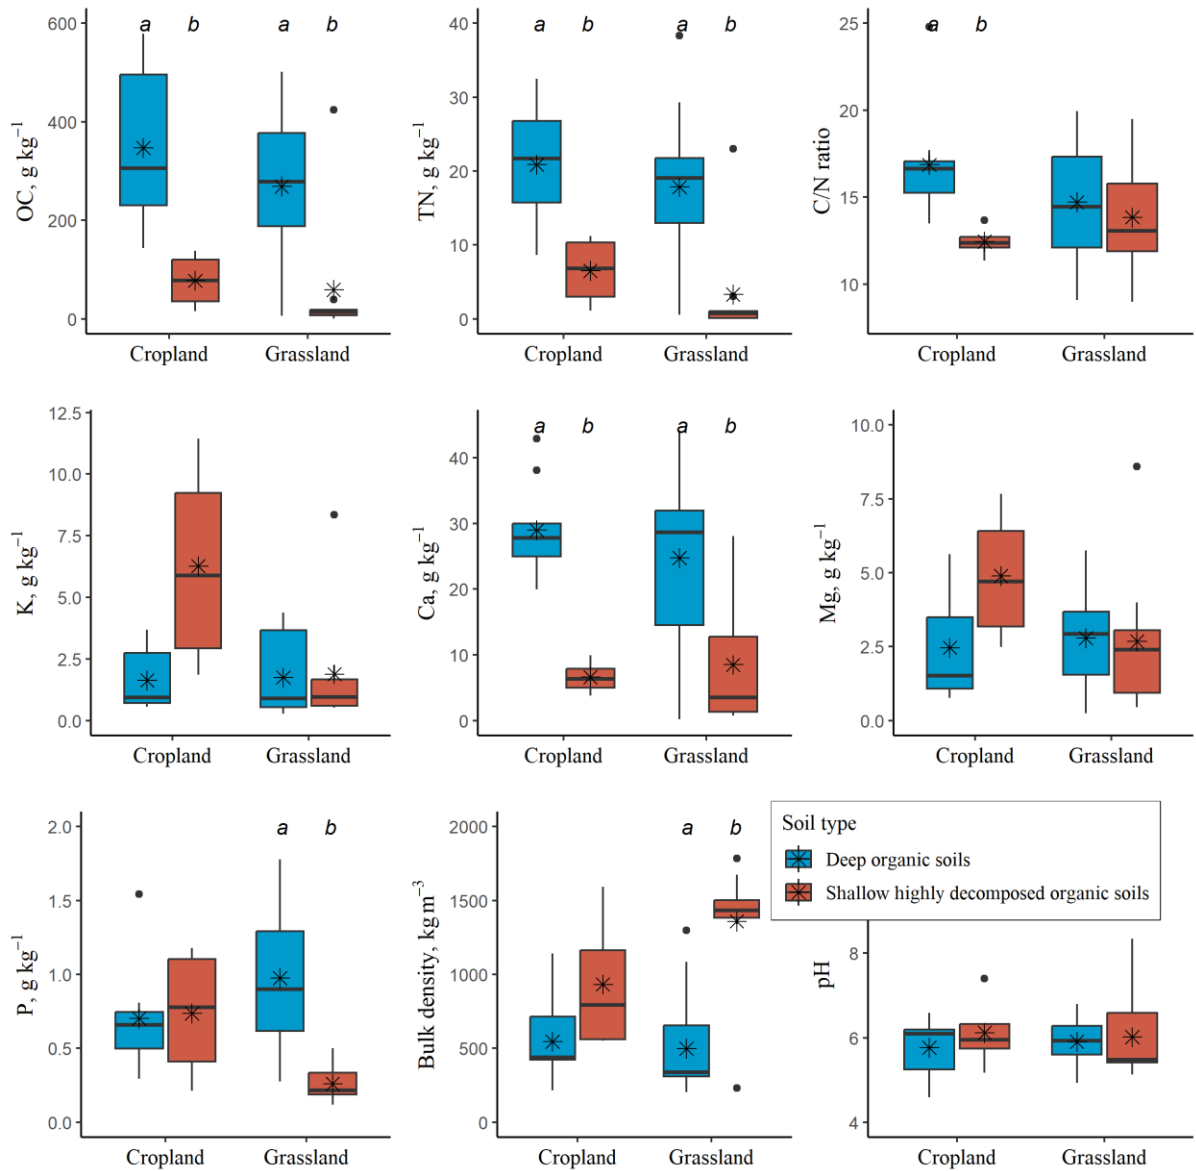

**Figure S7:** Variation in soil (20–40 cm soil layer) characteristics (organic carbon (OC), total nitrogen (TN), organic carbon/total nitrogen (C/N) ratio, HNO<sub>3</sub>-extractable potassium (K), calcium (Ca), magnesium (Mg) and phosphorus (P) concentration, soil bulk density, soil pH) in the cropland and grassland sites, separately for the two soil types (deep organic soil and shallow highly decomposed organic soil). In the boxplots, median and mean values (bold horizontal lines and asterisks, respectively) are presented; plot mean values were used for analysis. The boxes indicate the interquartile range (from 25<sup>th</sup> to 75<sup>th</sup> percentiles), the whiskers denote the minimum and maximum values, and the black dots show outliers. Statistically significant differences ( $p < 0.05$ , Wilcoxon rank sum exact test) between deep organic soil and shallow highly decomposed organic soil within the type of land use are denoted by lowercase letters a and b.



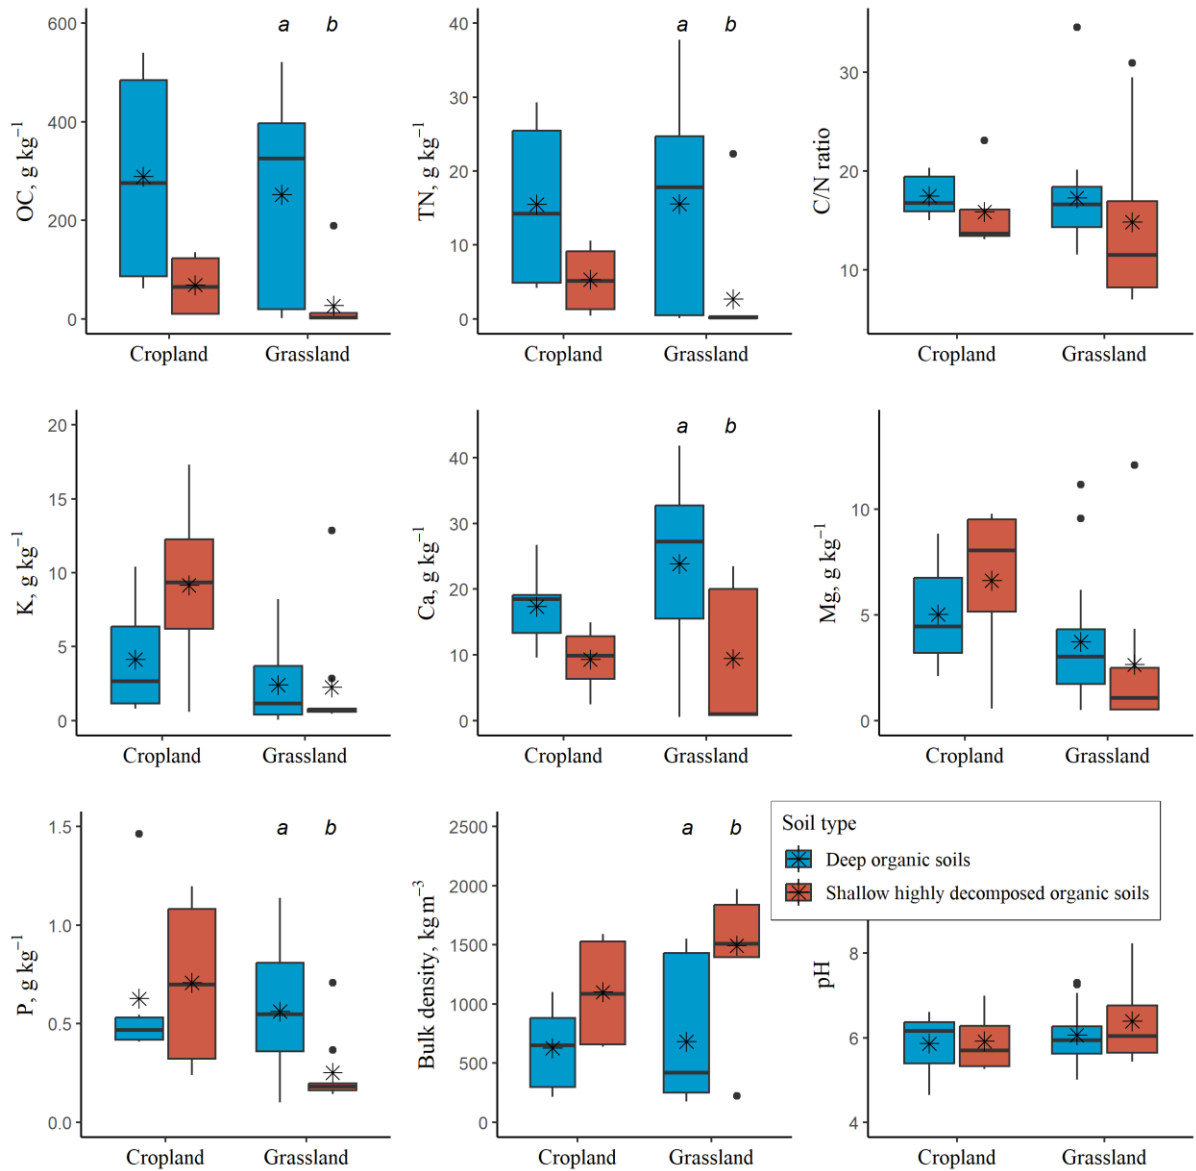

**Figure S8:** Variation in soil (40–80 cm soil layer) characteristics (organic carbon (OC), total nitrogen (TN), organic carbon/total nitrogen (C/N) ratio, HNO<sub>3</sub>-extractable potassium (K), calcium (Ca), magnesium (Mg) and phosphorus (P) concentration, soil bulk density, soil pH) in the cropland and grassland sites, separately for the two soil types (deep organic soil and shallow highly decomposed organic soil). In the boxplots, median and mean values (bold horizontal lines and asterisks, respectively) are presented; plot mean values were used for analysis. The boxes indicate the interquartile range (from 25<sup>th</sup> to 75<sup>th</sup> percentiles), the whiskers denote the minimum and maximum values, and the black dots show outliers. Statistically significant differences (p < 0.05, Wilcoxon rank sum exact test) between deep organic soil and shallow highly decomposed organic soil within the type of land use are denoted by lowercase letters a and b.

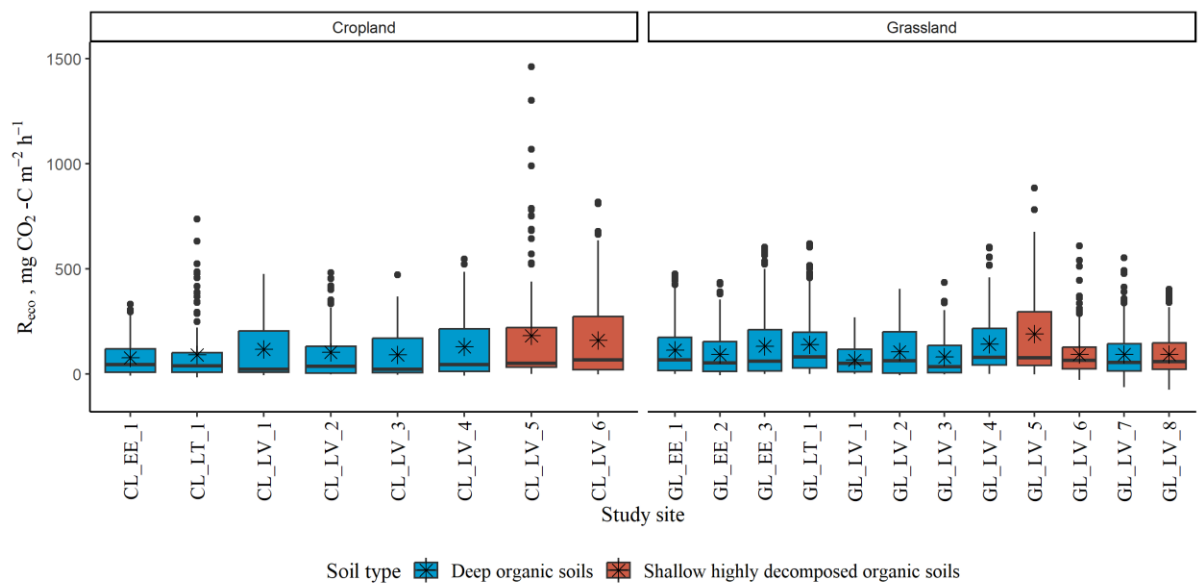

**Figure S9:** Variation in instantaneous ecosystem respiration ( $R_{eco}$ ) in cropland (left graph) and grassland (right graph) among different study sites depending on soil type (deep organic soil and shallow highly decomposed organic soil). In the boxplots, median and mean values (bold lines and asterisks, respectively) calculated from all performed  $R_{eco}$  measurements. The boxes indicate the interquartile range (from 25<sup>th</sup> to 75<sup>th</sup> percentiles), the whiskers denote the minimum and maximum values, black dots show outliers.

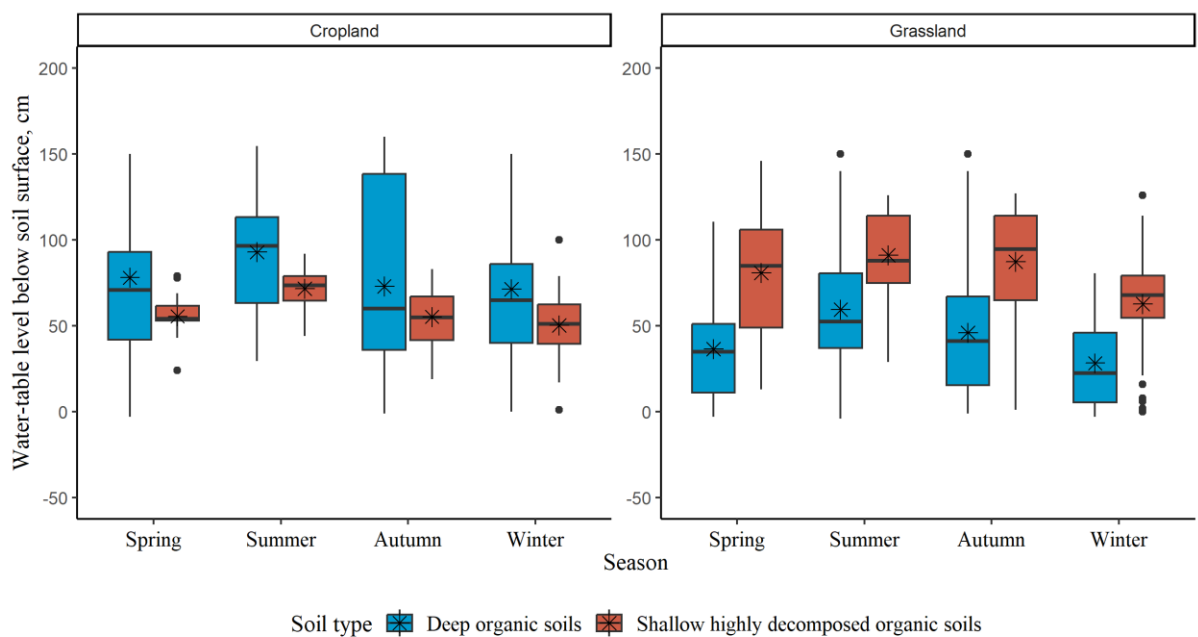

**Figure S10:** Variation in water-table level below soil surface in cropland (left graph) and grassland (right graph) among different seasons separately for the two soil types (deep organic soil and shallow highly decomposed organic soil). In the boxplots, median and mean values (bold lines and asterisks, respectively) calculated from all performed measurements are presented. The boxes indicate the interquartile range (from 25<sup>th</sup> to 75<sup>th</sup> percentiles), the whiskers denote the minimum and maximum values, black dots show outliers.

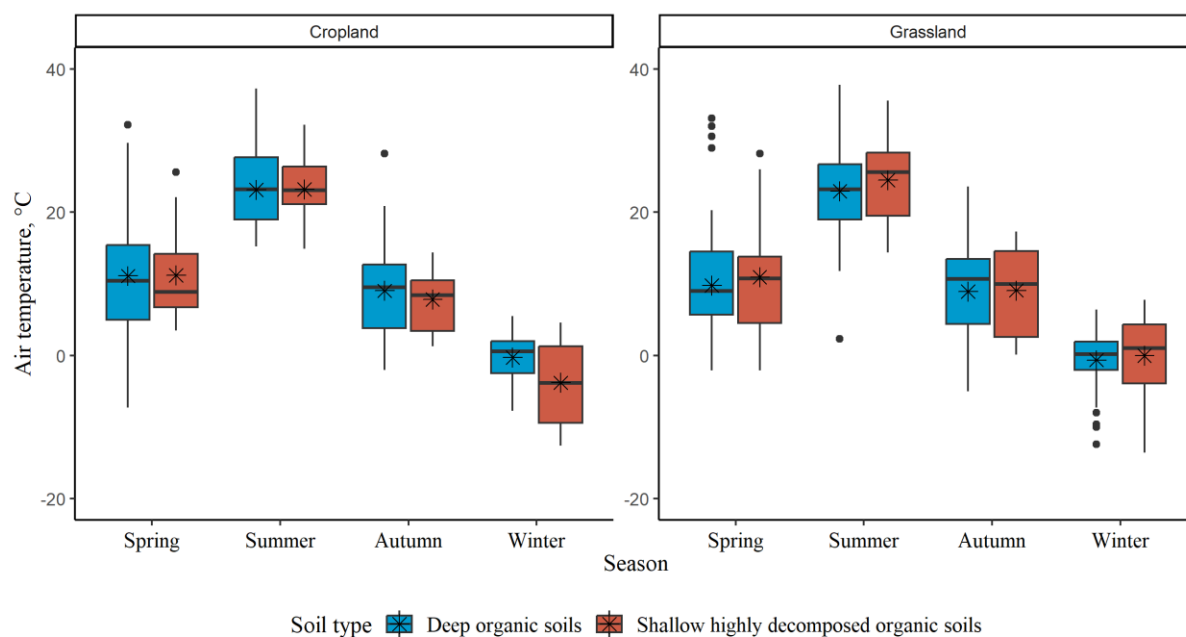

**Figure S11:** Variation in air temperature in cropland (left graph) and grassland (right graph) among different seasons separately for the two soil types (deep organic soil and shallow highly decomposed organic soil). In the boxplots, median and mean values (bold lines and asterisks, respectively) calculated from all performed measurements are presented. The boxes indicate the interquartile range (from 25<sup>th</sup> to 75<sup>th</sup> percentiles), the whiskers denote the minimum and maximums values, black dots show outliers.

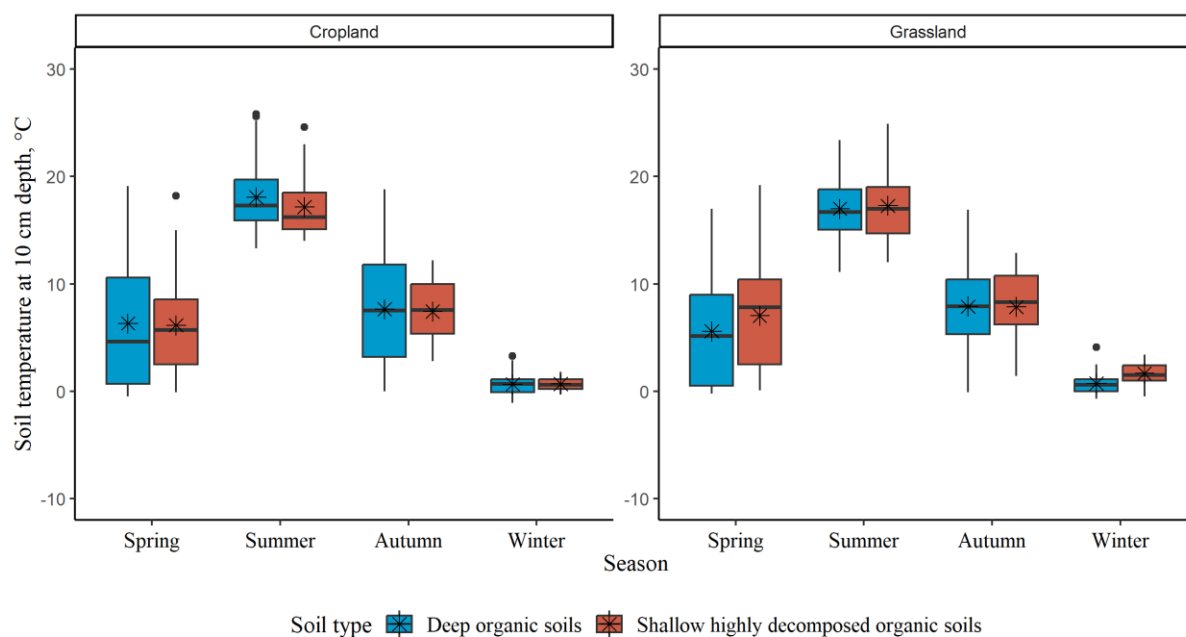

**Figure S12:** Variation in soil temperature at 10 cm depth in cropland (left graph) and grassland (right graph) among different seasons separately for the two soil types (deep organic soil and shallow highly decomposed organic soil). In the boxplots, median and mean values (bold lines and asterisks, respectively) calculated from all performed measurements are presented. The boxes indicate the interquartile range (from 25<sup>th</sup> to 75<sup>th</sup> percentiles), the whiskers denote the minimum and maximums values, black dots show outliers.

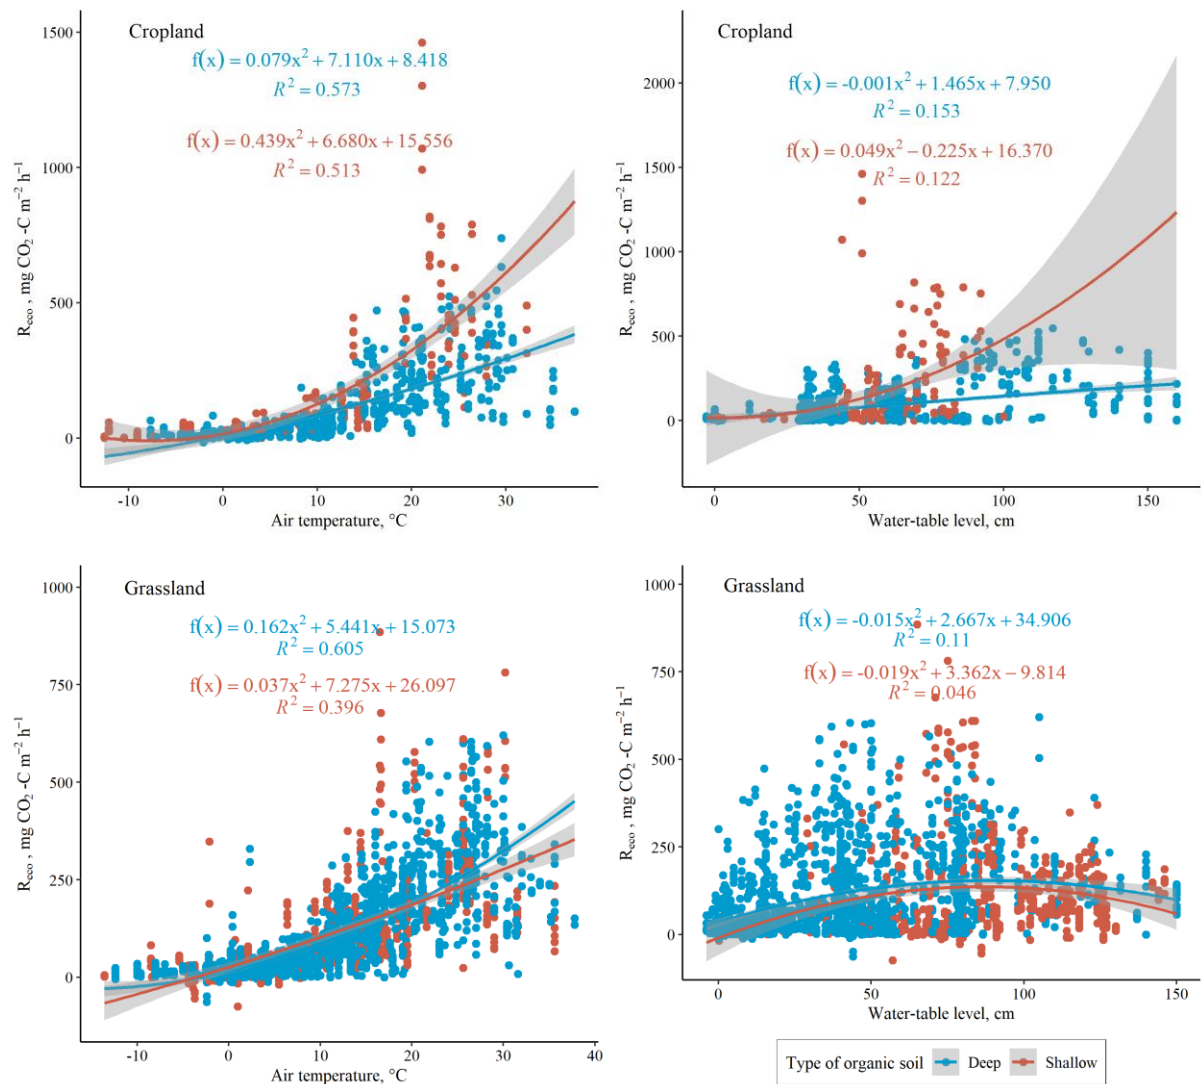

**Figure S13:** Instantaneous ecosystem respiration ( $R_{eco}$ ) in cropland and grassland as a function (polynomial regression) of air temperature and water-table level measured during each gas sampling event. Data of instantaneous ecosystem respiration is grouped by soil type (deep organic soil denoted by blue colour and shallow highly decomposed organic soil denoted by red colour). Grey area around regression line reflects the 95% confidence interval of regression.

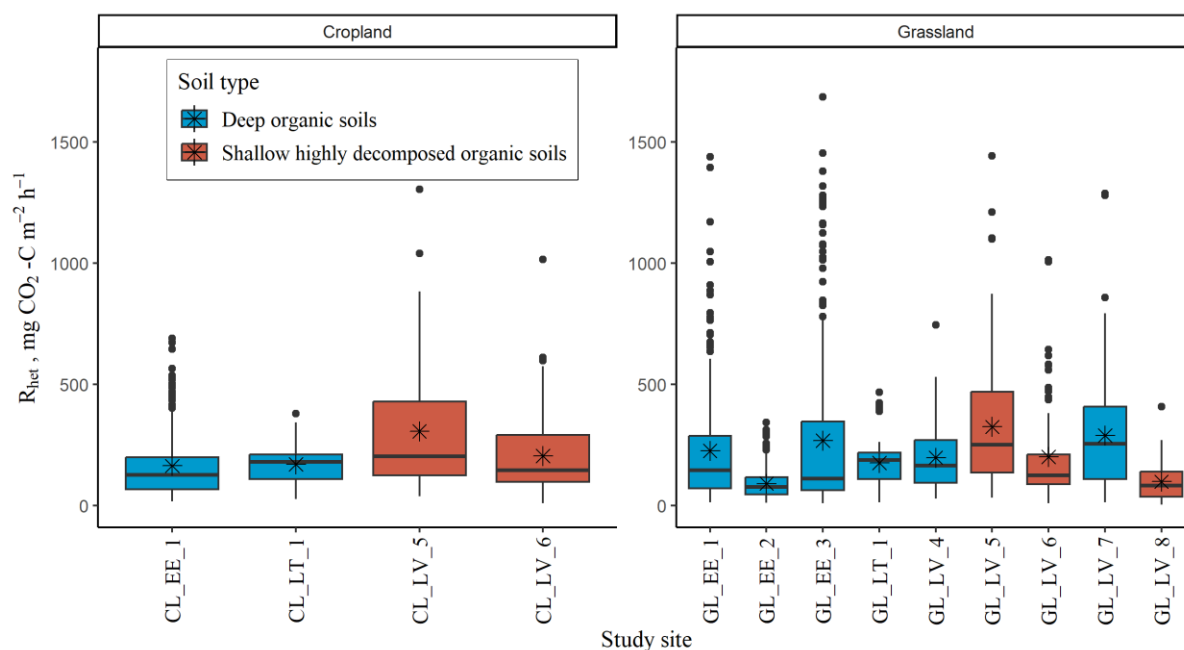

**Figure S14:** Variation in instantaneous soil heterotrophic respiration ( $R_{het}$ ) in cropland (left graph) and grassland (right graph) from April to November among different study sites grouped depending on soil type (deep organic soil and shallow highly decomposed organic soil). In the boxplots, median and mean values (bold lines and asterisks, respectively) calculated from all performed  $R_{het}$  measurements in four study sites in cropland and nine study sites in grassland are presented. The boxes indicate the interquartile range (from 25<sup>th</sup> to 75<sup>th</sup> percentiles), the whiskers denote the minimum and maximum values, black dots show outliers.

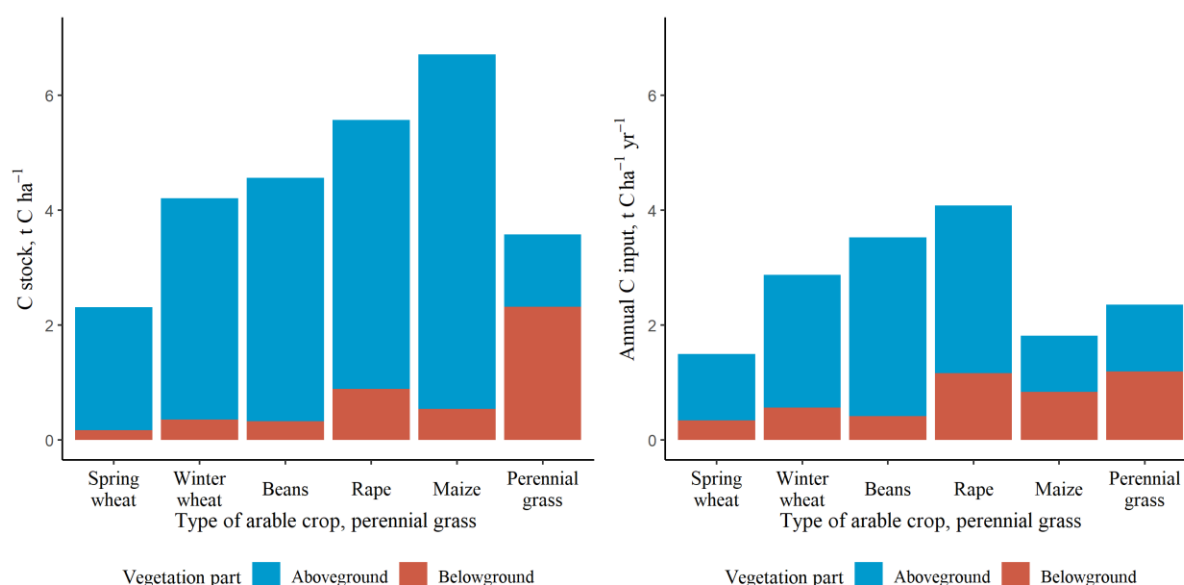

**Figure S15:** Variation in carbon stock in above- and belowground biomass of vegetation (left graph) and annual carbon input into soil by type of arable crop/perennial grass (right graph).

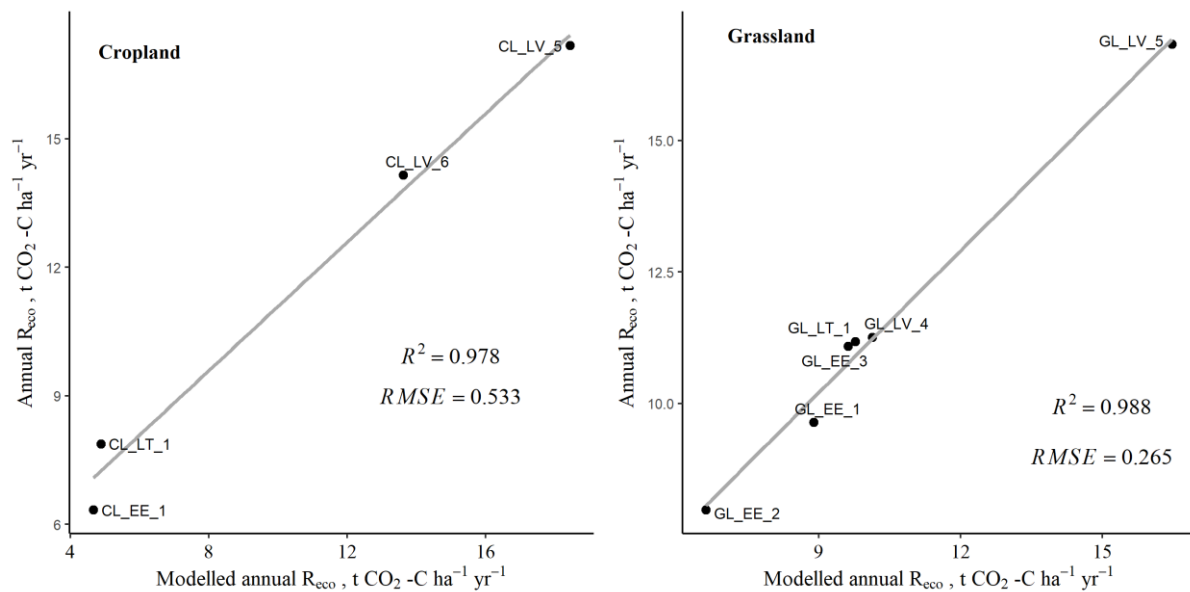

**Figure S16:** The comparison of estimated annual  $R_{eco}$  with the modeled annual  $R_{eco}$  based on continuous soil temperature measurements at depths of 10 cm at four study sites in cropland and six study sites in grassland.

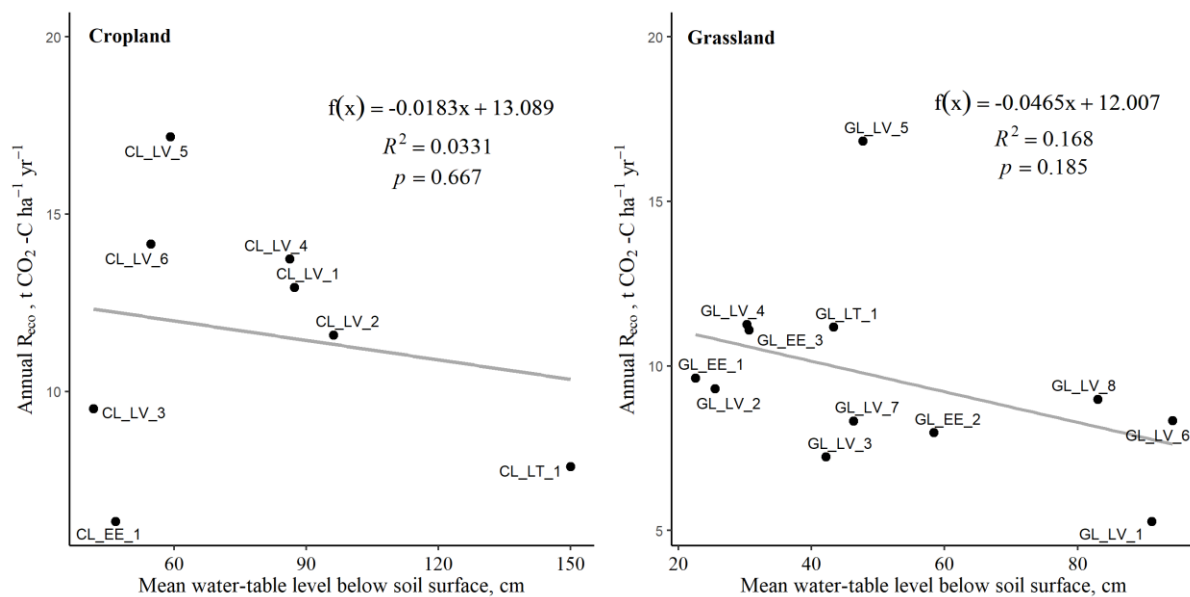

**Figure S17:** The relationship between annual  $R_{eco}$  and mean water-table level in study sites in cropland (left graph) and grassland (right graph).

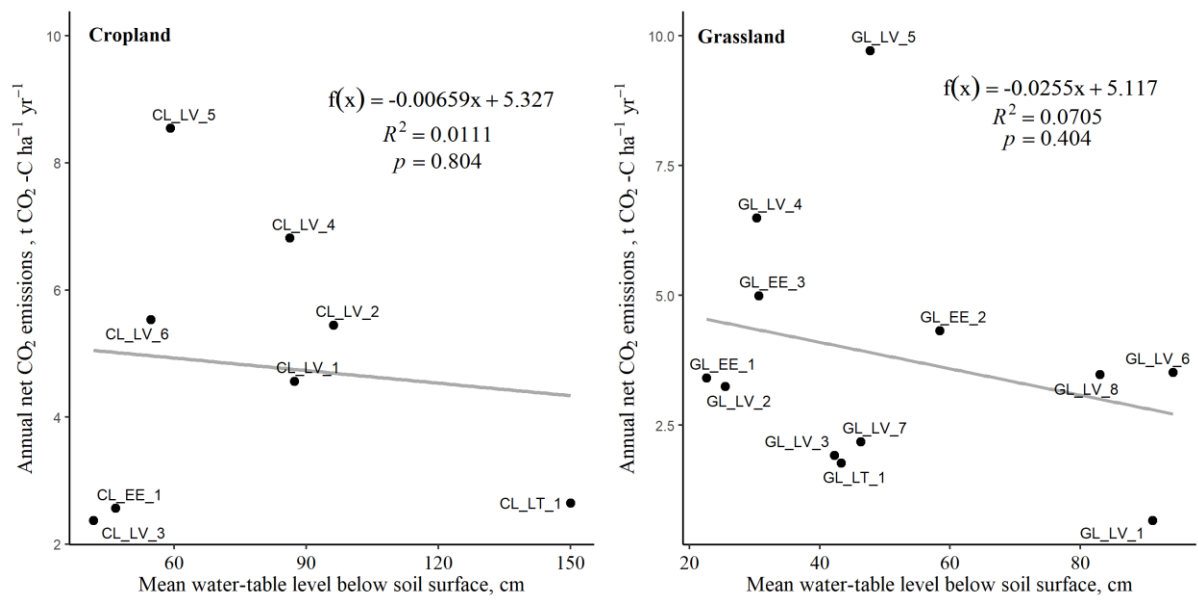

**Figure S18:** The relationship between annual net soil CO<sub>2</sub> emissions and mean water-table level in study sites in cropland (left graph) and grassland (right graph).
